# Supplementary material for: Gold nanoclusters encapsulated into zinc-glutamate metal organic frameworks for efficient detection of H2O2
Source: Royal Society of Chemistry journal article supplement (doi:10.1039/d2ay00195k), 2022-01-01
Supplement: d2ay00195k1.pdf [file d2ay00195k1.pdf]

1  
2  
3  
4  
5  
6  
7  
8  
9  
10  
11  
12  
13  
14  
15  
16  
17  
18  
19  
20  
21  
22  
23  
24  
25  
26  
27  
28  
29  
30  
31

## Supporting Information

### Gold nanoclusters encapsulated into zinc-glutamate metal organic frameworks for efficient detection of H<sub>2</sub>O<sub>2</sub>

*Hongyu Chen\*, Yuan Chang, Ran Wei, Pengcheng Zhang*

Henan Key Laboratory of Rare Earth Functional Materials; International Joint  
Research Laboratory for Biomedical Nanomaterials of Henan, Zhoukou Normal  
University, Zhoukou 466001, China.

---

\*Corresponding author. Tel: +86-394-8178518; fax: +86-394-8178518;  
E-mail address: chy199166@163.com

## 1 **Instruments**

2       Transmission electron microscopy (TEM) images were obtained on a JEOL-  
3 1230 (JEOL) transmission electron microscope operating at 100 kV. High-resolution  
4 TEM (HRTEM) images were obtained via a JEOL-1230 transmission electron  
5 microscope equipped with energy dispersive X-ray spectrometer (EDX) analyses at  
6 100 kV. The crystalline phases of AuNCs@ZnGlu-MOF were characterized using a  
7 Rigaku 2500 (Japan) X-ray diffractometer (XRD). X-ray photoelectron spectrum  
8 (XPS) was performed on K-Alpha 1063 (Thermo Fisher Scientific). The Zeta  
9 potential measurement was performed by the Nano-ZS Zetsozer ZEN3600 (Malvern  
10 Instruments Ltd., UK). Fourier transform infrared (FT-IR) spectra were obtained on  
11 an FT-IR spectrophotometer (Nicolet Instrument Co., USA). Fluorescence spectra  
12 were carried out on F-7000 fluorescence spectrophotometer (Hitachi, Japan). Steady-  
13 state luminescence lifetime measurements were performed using an Edinburgh FLS  
14 980 Lifetime and Steady-State spectrometer.

15

16

17

18

19

20

21

22

23

24

25

26

1

2

3

4

5

6

7

8

9

10

11

12

13 **Fig. S1** Fluorescence spectra of AuNCs@ZnGlu-MOF with different portions of  
14 ZnGlu-MOF.

15

16

17

18

19

20

21

22

23

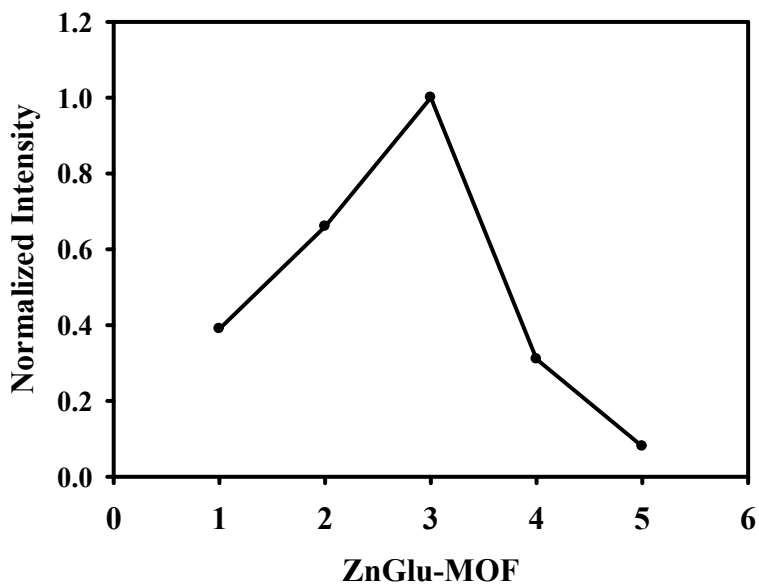

1

2

3

4 **Table S1** Detail information for preparation of AuNCs@ZnGlu-MOF with different  
5 portions of ZnGlu-MOF.

6

| AuNCs@ZnGlu-MOF                          | N = 5  | N=4    | N=3    | N=2    | N=1    |
|------------------------------------------|--------|--------|--------|--------|--------|
| ZnSO <sub>4</sub> ·7H <sub>2</sub> O (g) | 0.036  | 0.018  | 0.009  | 0.0023 | 0.0012 |
| L-glutamate (g)                          | 0.018  | 0.009  | 0.0045 | 0.0011 | 0.0005 |
| NaOH (g)                                 | 0.0125 | 0.0063 | 0.0031 | 0.0008 | 0.0004 |
| Vethanol:VH <sub>2</sub> O               |        |        | 1:1    |        |        |
| AuNCs (mL)                               |        |        | 1      |        |        |

7

8

9

10

11

12

13

14

15

16

17

18

1

2

3

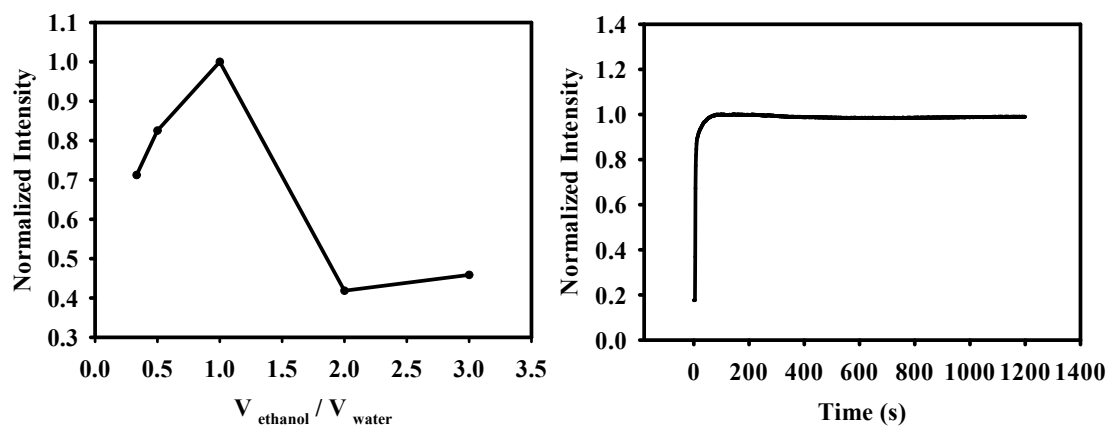

4

5

6 **Fig. S2** Fluorescence spectra of AuNCs@ZnGlu-MOF with different ratios of ethanol  
7 and H<sub>2</sub>O (A). Effect of reaction time (B).

8

9

10

11

12

13

14

15

16

17

18

19

20

21

22

1

2

3

|                                     | Mean (mV)            | Area (%) | St Dev (mV) |
|-------------------------------------|----------------------|----------|-------------|
| <b>Zeta Potential (mV):</b> -4.85   | <b>Peak 1:</b> -4.85 | 100.0    | 3.75        |
| <b>Zeta Deviation (mV):</b> 3.75    | <b>Peak 2:</b> 0.00  | 0.0      | 0.00        |
| <b>Conductivity (mS/cm):</b> 0.0846 | <b>Peak 3:</b> 0.00  | 0.0      | 0.00        |

**Result quality:** Good

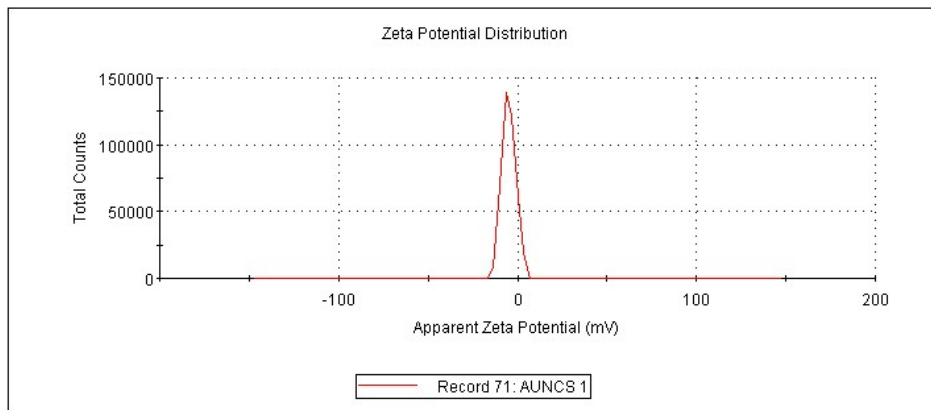

4

5

6 **Fig. S3** Zeta potential of AuNCs.

7

8

9

10

11

12

13

14

15

16

17

1

2

3

|                                     | Mean (mV)            | Area (%) | St Dev (mV) |
|-------------------------------------|----------------------|----------|-------------|
| <b>Zeta Potential (mV): 6.53</b>    | <b>Peak 1:</b> 7.25  | 88.5     | 2.85        |
| <b>Zeta Deviation (mV): 3.80</b>    | <b>Peak 2:</b> -1.39 | 11.5     | 2.03        |
| <b>Conductivity (mS/cm): 0.0415</b> | <b>Peak 3:</b> 0.00  | 0.0      | 0.00        |
| <b>Result quality Good</b>          |                      |          |             |

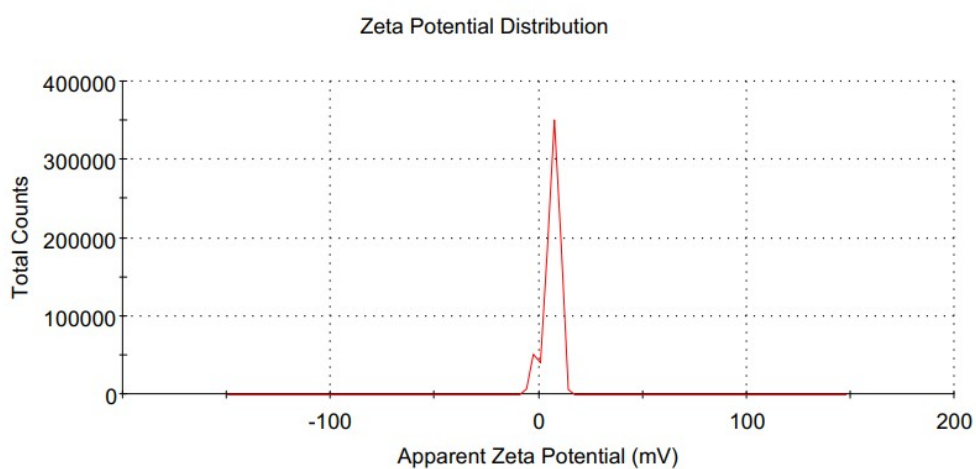

4

5

6 **Fig. S4** Zeta potential of AuNCs-Zn<sup>2+</sup>.

7

8

9

10

11

12

13

14

15

1

2

3

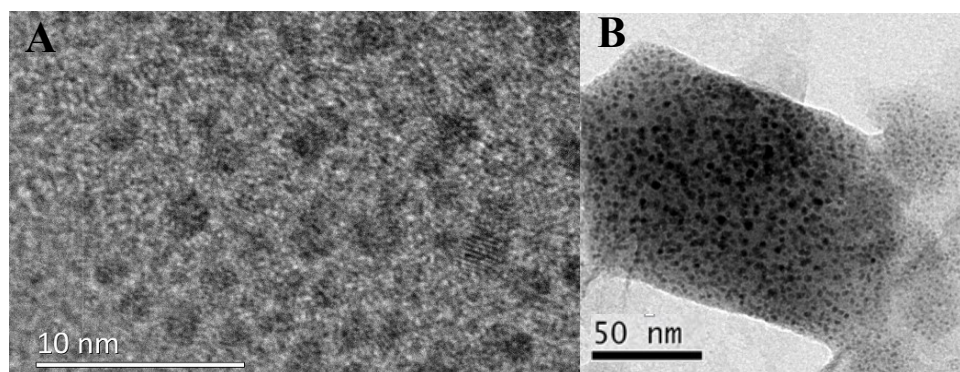

4

5

6 **Fig. S5** TEM images of AuNCs (A), AuNCs@ZnGlu-MOF (B).

7

8

9

10

11

12

13

14

15

16

17

18



1

2

3

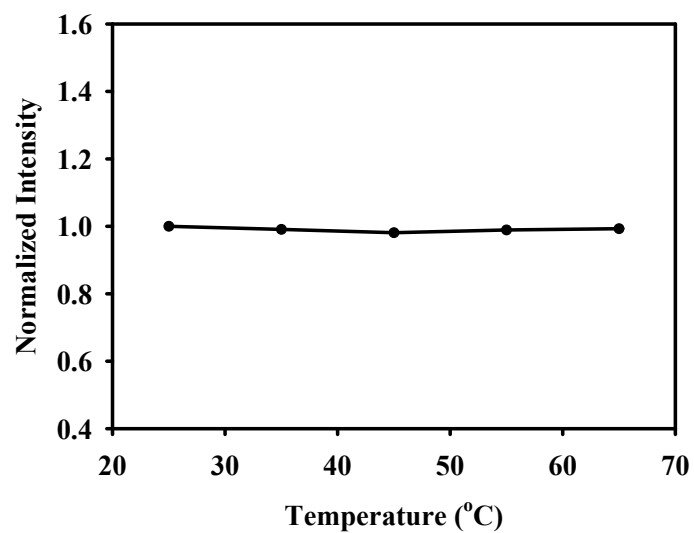

4

5

6 **Fig. S6** Fluorescence spectra of Au NCs@ZnGlu-MOF with different temperature (25  
7 °C, 35 °C, 45 °C, 55 °C, 65 °C). [AuNCs@ZnGlu-MOF]: 0.1 mg/mL.

8

9

10

11

12

13

14

15

16

17

1

2

3

4

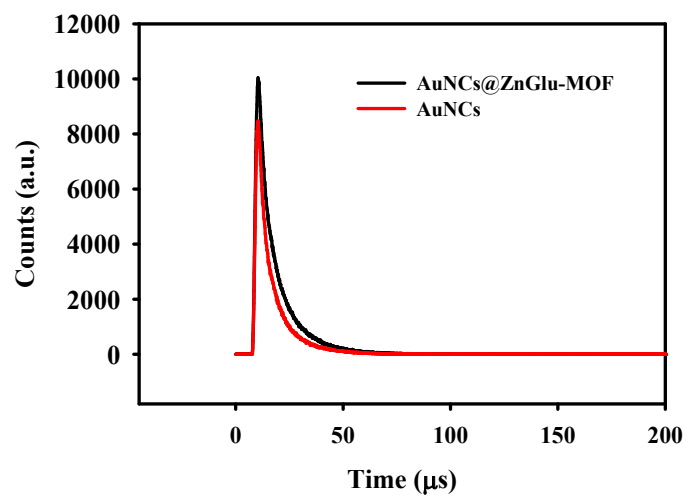

5

6

7 **Fig. S7** The fluorescence lifetimes of AuNCs@ZnGlu-MOF in the absence (black line)

8 and presence of I<sub>2</sub> (red line).

9

10

11

12

13

14

15

16

17

18

19

20

1

2

3

4

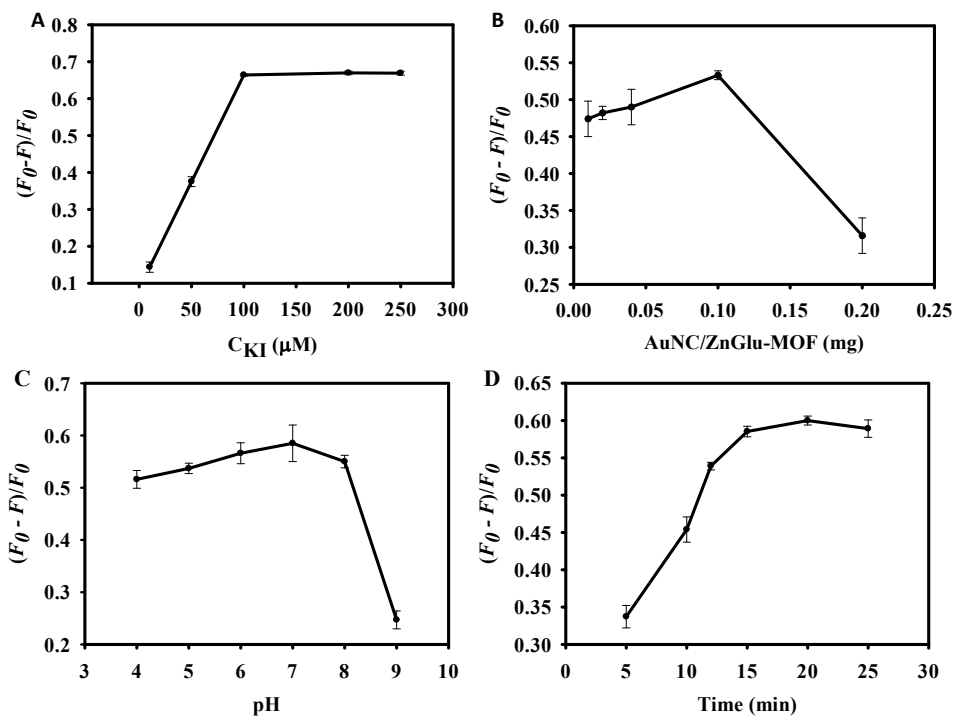

5

6

7 **Fig. S8** Effects of  $I^-$  concentrations (A), AuNCs@ZnGlu-MOF amount (B), pH (C)  
8 and incubation time (D) on the fluorescence response of the nanosensor for  $H_2O_2$   
9 detection.  $F_0$  and  $F$  stand for the fluorescent intensities of AuNCs@ZnGlu-  
10 MOF/HRP/ $I^-$  mixture in the absence and presence of  $H_2O_2$ , respectively.

11

12

13

14

15

16

17

18

19

20

21

22

1

2

3

4 **Table S2** Comparison of different methods for the determination of H<sub>2</sub>O<sub>2</sub>.

5

| Methods     | Linear range<br>( $\mu\text{M}$ ) | Detection limit<br>( $\mu\text{M}$ ) | Reference    |
|-------------|-----------------------------------|--------------------------------------|--------------|
| Colorimetry | 10-1000                           | 5.29                                 | [1]          |
| Colorimetry | 0.5-100                           | 0.047                                | [2]          |
| Colorimetry | 10000-100000                      | 54                                   | [3]          |
| Fluorometry | 0-40                              | 0.26                                 | [4]          |
| Fluorometry | 0-20                              | 0.86                                 | [5]          |
| Fluorometry | 0-30                              | 2.1                                  | [6]          |
| Fluorometry | 2-50                              | 0.57                                 | [7]          |
| Fluorometry | 0.02-5                            | 0.013                                | Present work |

6

7

8

9

10

11

12

13

14

15

16

17

18

19

1

2

3

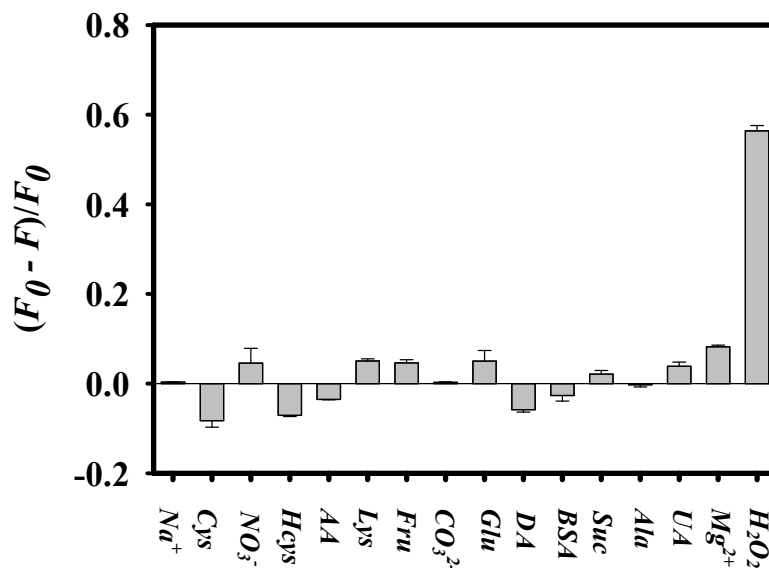

4

5

6 **Fig. S9** Fluorescence response of AuNCs@ZnGlu-MOF in the presence of  $\text{H}_2\text{O}_2$  or  
7 other substances ( $\text{Na}^+$ , cysteine (Cys),  $\text{NO}_3^-$ , homocysteine (Hcys), ascorbic acid (AA),  
8 lysine (Lys), fructose (Fru),  $\text{CO}_3^{2-}$ , glucose (Glu), dopamine (DA), bovine serum  
9 (BSA), sucrose (Suc), alanine (Ala), uric acid (UA)). The concentration of  $\text{H}_2\text{O}_2$  was  
10 5  $\mu\text{M}$ , and the level of other species were 50  $\mu\text{M}$ .

11

12

13

14

15

16

17

18

19

20

21

22

1

2

3

4 **Table S3** Detection of spiked H<sub>2</sub>O<sub>2</sub> in real samples.

5

| Samples | Added<br>( $\mu\text{M}$ ) | Measured<br>( $\mu\text{M}$ ) | Recovery<br>(%) | RSD<br>(n=3, %) |
|---------|----------------------------|-------------------------------|-----------------|-----------------|
| Serum 1 | 0.05                       | 0.053                         | 106             | 2.98            |
|         | 0.5                        | 0.48                          | 96.0            | 3.15            |
|         | 2                          | 1.97                          | 98.5            | 2.36            |
| Serum 2 | 0.05                       | 0.048                         | 96.0            | 1.95            |
|         | 0.5                        | 0.52                          | 104             | 2.31            |
|         | 2                          | 1.95                          | 97.5            | 4.16            |
| Serum 3 | 0.05                       | 0.049                         | 98.0            | 2.17            |
|         | 0.5                        | 0.49                          | 96.0            | 3.53            |
|         | 2                          | 1.91                          | 95.5            | 2.12            |

6

7

8 Reference

- 9 1. H. Liu, Y. Ding, B. Yang, Z. Liu, Q. Liu and X. Zhang, *Sens. Actuators, B*, 2018,  
10 **271**, 336-345.
- 11 2. X. Xu, P. Luo, H. Yang, S. Pan, H. Liu and X. Hu, *Sens. Actuators, B*, 2021, **335**,  
12 129671.
- 13 3. L. Li, X. Liu, R. Zhu, B. Wang, J. Yang, F. Xu, S. Ramaswamy and X. Zhang,  
14 *ACS Sustain. Chem. Eng.*, 2021, **9**, 12833-12843.
- 15 4. P. Zhao, K. Wang, X. Zhu, Y. Zhou and J. Wu, *Dyes Pigm.*, 2018, **155**, 143-149.
- 16 5. S. Liu, S. Mo, L. Han, N. Li, Y. Fan, N. Li and H. Luo, *Anal. Chim. Acta*, 2019,  
17 **1055**, 81-89.
- 18 6. M. Ren, B. Deng, K. Zhou, X. Kong, J. Wang and W. Lin, *Anal. Chem.*, 2017, **89**,

---

1 552-555.

2 7. Q. Lu, J. Wang, B. Li, C. Weng, X. Li, W. Yang, X. Yan, J. Hong, W. Zhu and X.

3 Zhou, *Anal. Chem.*, 2020, **92**, 7770-7777.

4

5
